# Supplementary material for: A modular and optimized single marker system for generating Trypanosoma brucei cell lines expressing T7 RNA polymerase and the tetracycline repressor
Source: PubMed Central journal article supplement (PMC3352093; doi:10.1098/rsob.110037), 2012-02
Supplement: rsob110037-s3.pdf [file rsob110037-s3.pdf]

# Loading control for figure 2A

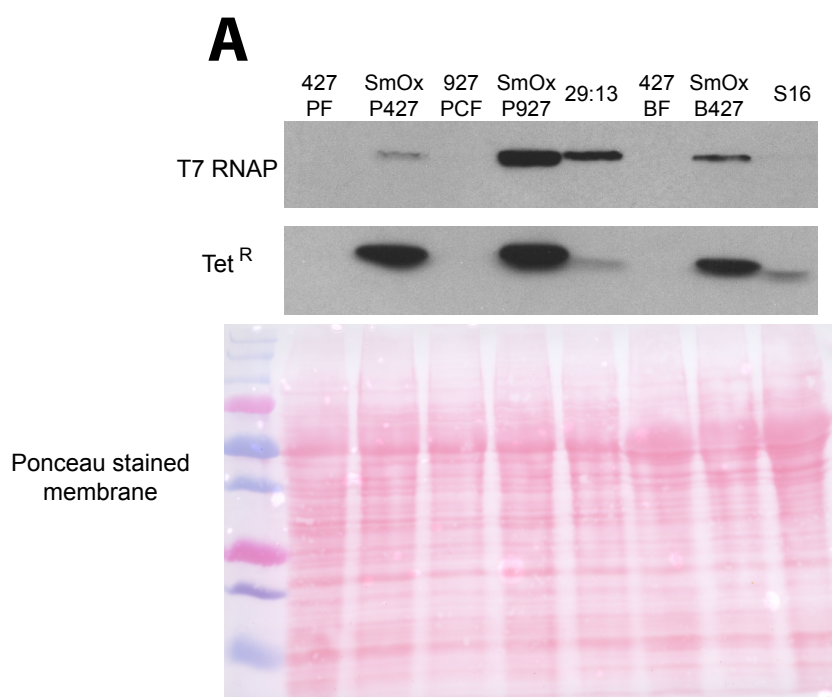

## Loading control for Figure 4A

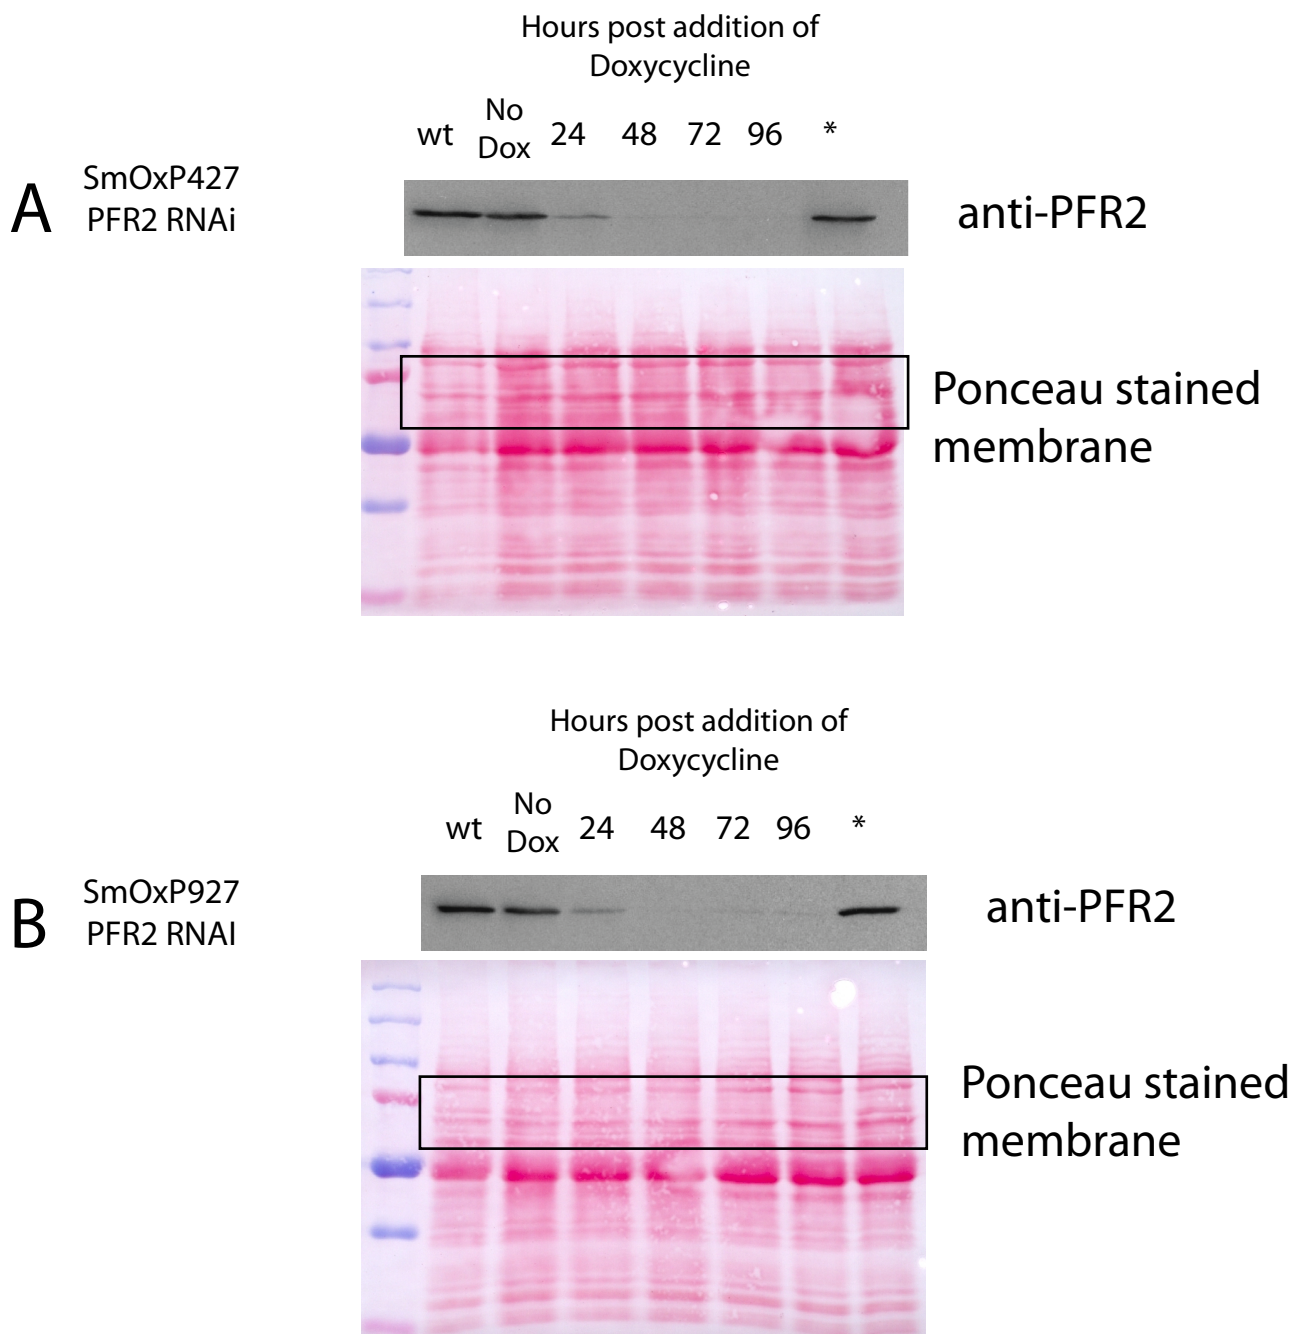

In both cases the black box indicates the area of the membrane shown in the western blot.
